# Supplementary material for: Immunoglobulin recognition of fecal bacteria in stunted and non-stunted children: findings from the Afribiota study
Source: Springer Nature journal article supplement (doi:10.1186/s40168-020-00890-1), 2020-07-27
Supplement: MOESM10 [file 40168_2020_890_MOESM10_ESM.pdf]

**Table S1.**

| Description                                 | Madagascar<br>(N=78) | CAR<br>(N=60) | <i>P</i>       |
|---------------------------------------------|----------------------|---------------|----------------|
| <b>Sex</b>                                  |                      |               |                |
| Male                                        | 37/78 (47.4%)        | 27/60 (45.0%) | 0.8636         |
| Female                                      | 41/78 (52.6%)        | 33/60 (55.0%) |                |
| <b>Age</b>                                  |                      |               |                |
| Median (months)                             | 42.6                 | 38.0          | 0.6770         |
| 2-3 years                                   | 28/78 (35.9%)        | 26/60 (43.3%) |                |
| 3-4 years                                   | 23/78 (29.5%)        | 12/60 (20.0%) |                |
| 4-5+ years                                  | 27/78 (34.6%)        | 21/60 (35.0%) |                |
| <b>Nutritional status</b>                   |                      |               |                |
| Median HAZ score                            | -2.12                | -1.90         | 0.7360         |
| Median WHZ score                            | -0.40                | -0.50         | 0.8839         |
| Median hemoglobin (g/100 mL serum)          | 11.5                 | 10.7          | <b>0.0014</b>  |
| Presence of anemia                          | 22/77 (28.6%)        | 23/53 (43.4%) | <b>0.0019</b>  |
| <b>Breastfeeding</b>                        |                      |               |                |
| Median duration (months)                    | 24                   | 18            | <b>1.3e-06</b> |
| <b>Inflammation</b>                         |                      |               |                |
| Median AAT (mg/g dry fecal weight)          | 49.5                 | 37.0          | 0.0809         |
| Median calprotectin (µg/g dry fecal weight) | 502                  | 296           | <b>0.0009</b>  |
| Elevated CRP (> 10 mg/l serum)              | 7/77 (9.1%)          | 10/50 (20.0%) | 0.1088         |
| <b>Parasites</b>                            |                      |               |                |
| Presence of helminths                       | 69/78 (88.5%)        | 1/47 (2.1%)   | <b>2.2e-16</b> |
| Presence of <i>Giardia</i>                  | 19/78 (24.4%)        | 9/47 (19.1%)  | 0.6584         |
| <b>Sequencing Batch</b>                     |                      |               |                |
| Batch 1                                     | 40/78 (51.2%)        | 13/60 (21.7%) | <b>0.0004</b>  |
| Batch 2                                     | 38/78 (48.7%)        | 47/60 (78.3%) |                |
