# Supplementary material for: Immunoglobulin recognition of fecal bacteria in stunted and non-stunted children: findings from the Afribiota study
Source: Springer Nature journal article supplement (doi:10.1186/s40168-020-00890-1), 2020-07-27
Supplement: MOESM11 [file 40168_2020_890_MOESM11_ESM.pdf]

**Table S2.**

| Subset         | Phylum                | Genus                                                     |
|----------------|-----------------------|-----------------------------------------------------------|
| All, Mada, CAR | <i>Firmicutes</i>     | <i>Streptococcus</i>                                      |
| All, Mada      | <i>Firmicutes</i>     | <i>Dialister</i>                                          |
| All, CAR       | <i>Bacteroidetes</i>  | <i>Parabacteroides</i>                                    |
| All, CAR       | <i>Bacteroidetes</i>  | <i>Bacteroides</i>                                        |
| All, Mada, CAR | <i>Proteobacteria</i> | <i>Pseudomonas</i>                                        |
| All, Mada      | <i>Proteobacteria</i> | <i>Stenotrophomonas</i>                                   |
| All, Mada, CAR | <i>Proteobacteria</i> | <i>Brevundimonas</i>                                      |
| All, Mada      | <i>Proteobacteria</i> | <i>Pelagibacterium</i>                                    |
| All            | <i>Proteobacteria</i> | <i>Allorhizobium-Neorhizobium-Pararhizobium-Rhizobium</i> |
| All, Mada      | <i>Firmicutes</i>     | <i>Roseburia</i>                                          |
| All, Mada      | <i>Firmicutes</i>     | <i>Agathobacter</i>                                       |
| All, Mada, CAR | <i>Firmicutes</i>     | <i>Butyricoccus</i>                                       |
| All, Mada, CAR | <i>Firmicutes</i>     | <i>Faecalibacterium</i>                                   |
| All, Mada      | <i>Firmicutes</i>     | <i>Blautia</i>                                            |
| All, Mada, CAR | <i>Firmicutes</i>     | <i>Lachnospiraceae</i> uncultured                         |
| All, Mada      | <i>Bacteroidetes</i>  | <i>Prevotella</i> 9                                       |
| Mada           | <i>Firmicutes</i>     | <i>Christensenellaceae</i> R-7 group                      |
| CAR            | <i>Firmicutes</i>     | <i>Ruminococcus</i> 1                                     |
