# Supplementary material for: Immunoglobulin recognition of fecal bacteria in stunted and non-stunted children: findings from the Afribiota study
Source: Springer Nature journal article supplement (doi:10.1186/s40168-020-00890-1), 2020-07-27
Supplement: MOESM12 [file 40168_2020_890_MOESM12_ESM.pdf]

Table S3.

| Batch(es) | Phylum                | Genus                                                  |
|-----------|-----------------------|--------------------------------------------------------|
| Sort, Seq | <i>Proteobacteria</i> | <i>Pseudomonas</i>                                     |
| Sort, Seq | <i>Proteobacteria</i> | <i>Brevundimonas</i>                                   |
| Sort, Seq | <i>Proteobacteria</i> | <i>Allorhizobium-Neorhizobium-Pararhizobium-Rhizob</i> |
| Seq       | <i>Bacteroidetes</i>  | <i>Prevotella 9</i>                                    |
| Sort      | <i>Firmicutes</i>     | <i>Ruminococcaceae</i> UCG-005                         |
