# Supplementary material for: Immunoglobulin recognition of fecal bacteria in stunted and non-stunted children: findings from the Afribiota study
Source: Springer Nature journal article supplement (doi:10.1186/s40168-020-00890-1), 2020-07-27
Supplement: MOESM13 [file 40168_2020_890_MOESM13_ESM.pdf]

**Table S4.**

| ChildID | HAZ          | WHZ   | History of diarrhea | AAT             | Calpro          | CRP  |
|---------|--------------|-------|---------------------|-----------------|-----------------|------|
| AF57    | <b>-4.31</b> | -0.73 | No                  | <b>&gt;mean</b> | <mean           | <=10 |
| AF60    | <b>-3.33</b> | -1.54 | No                  | <mean           | <mean           | <=10 |
| AF61    | -1.78        | 0.53  | <b>Yes</b>          | <mean           | <b>&gt;mean</b> | <=10 |
| AF63    | <b>-3.29</b> | -0.21 | <b>Yes</b>          | <b>&gt;mean</b> | <mean           | <=10 |
| AF91    | <b>-3.38</b> | -0.55 | No                  | <b>&gt;mean</b> | <b>&gt;mean</b> | <=10 |
