# Supplementary figures and images for: Immunoglobulin recognition of fecal bacteria in stunted and non-stunted children: findings from the Afribiota study
Source: Springer Nature journal article supplement (doi:10.1186/s40168-020-00890-1), 2020-07-27

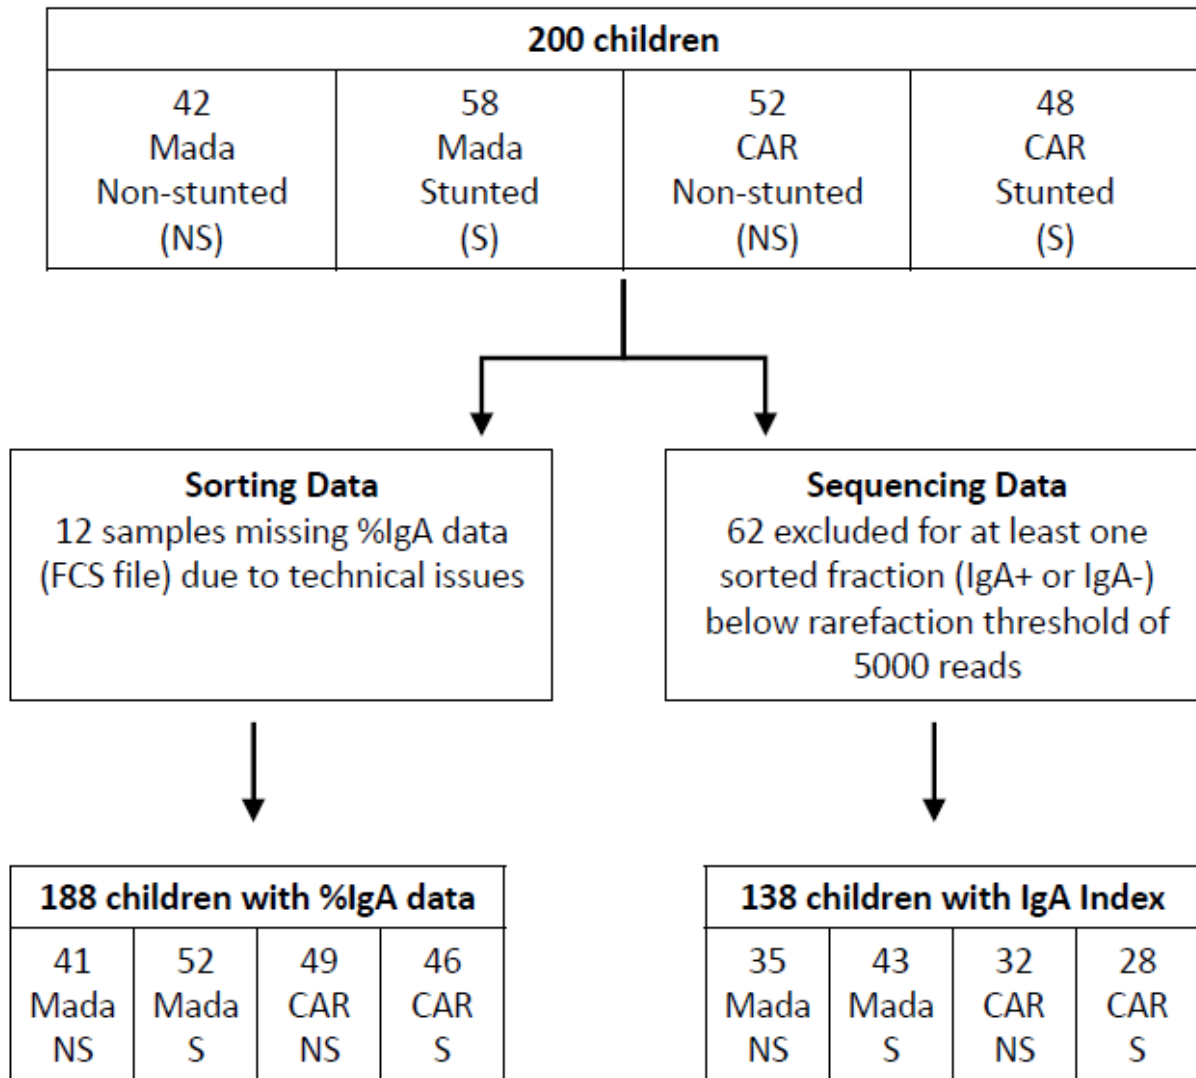

**Fig S1.**

Supplement: MOESM1 [file 40168_2020_890_MOESM1_ESM.pdf]

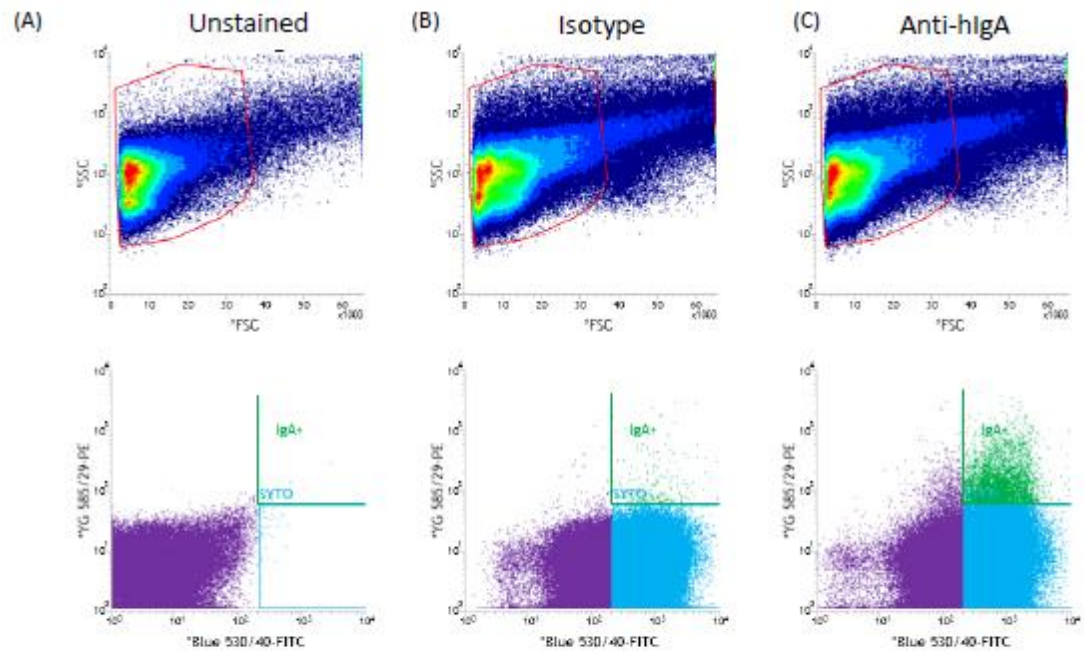

Fig S2.

Supplement: MOESM2 [file 40168_2020_890_MOESM2_ESM.pdf]

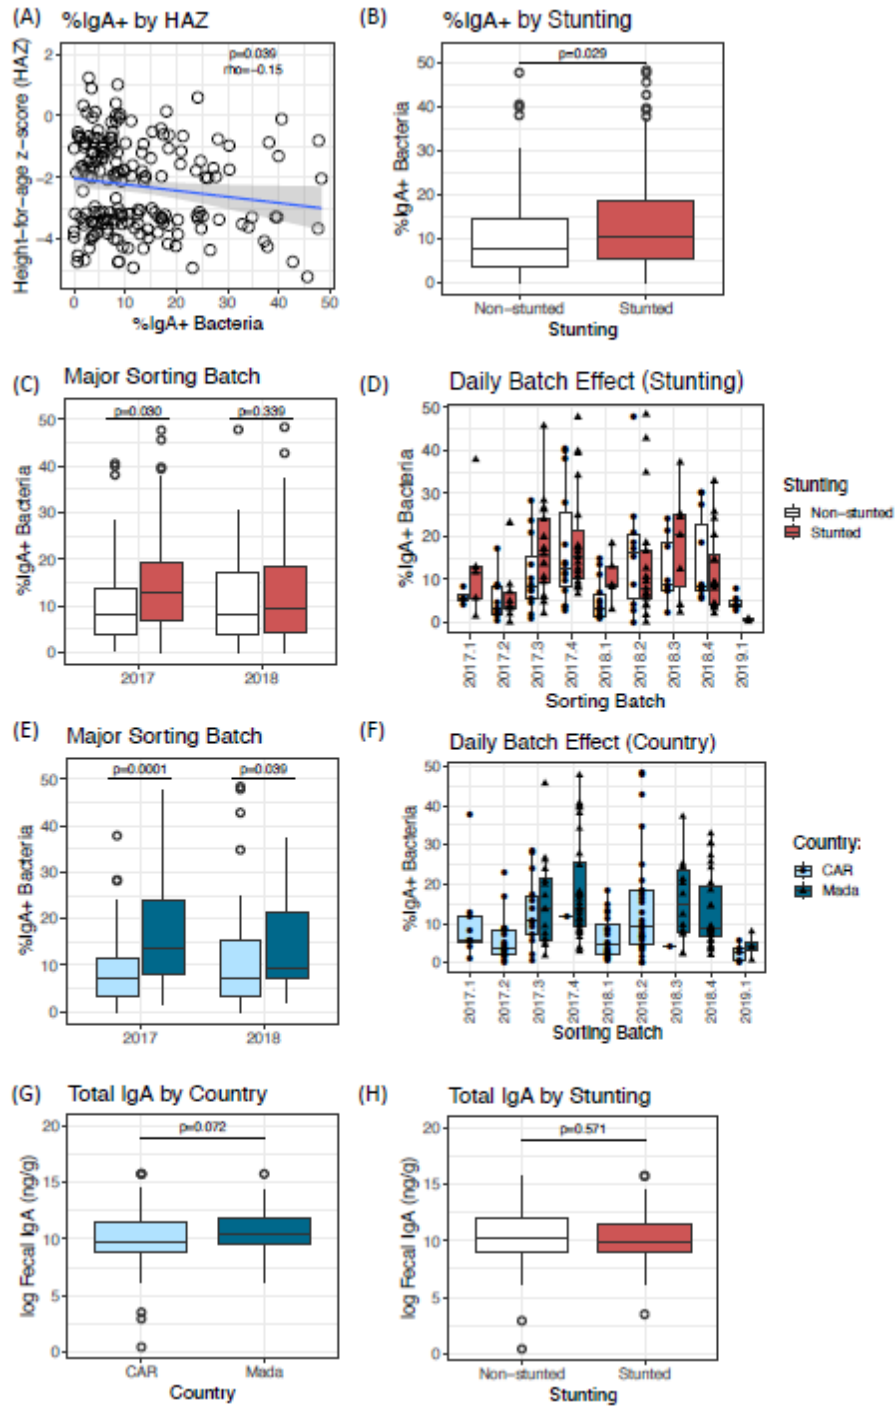

Fig S3.

Supplement: MOESM3 [file 40168_2020_890_MOESM3_ESM.pdf]

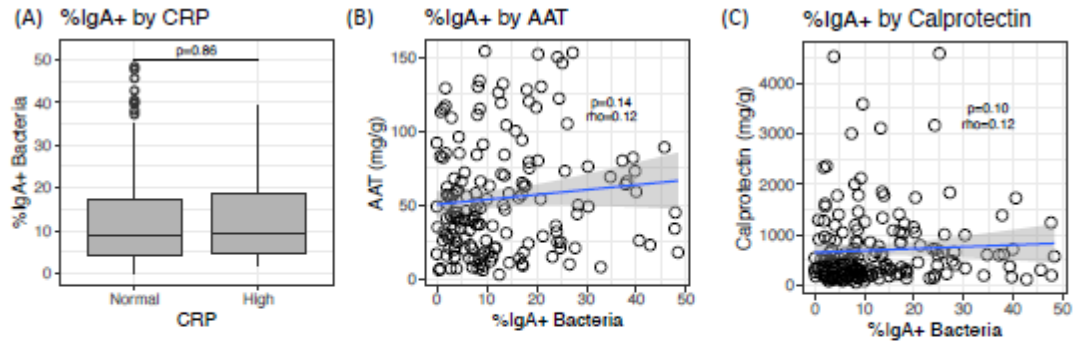

Fig S4.

Supplement: MOESM4 [file 40168_2020_890_MOESM4_ESM.pdf]

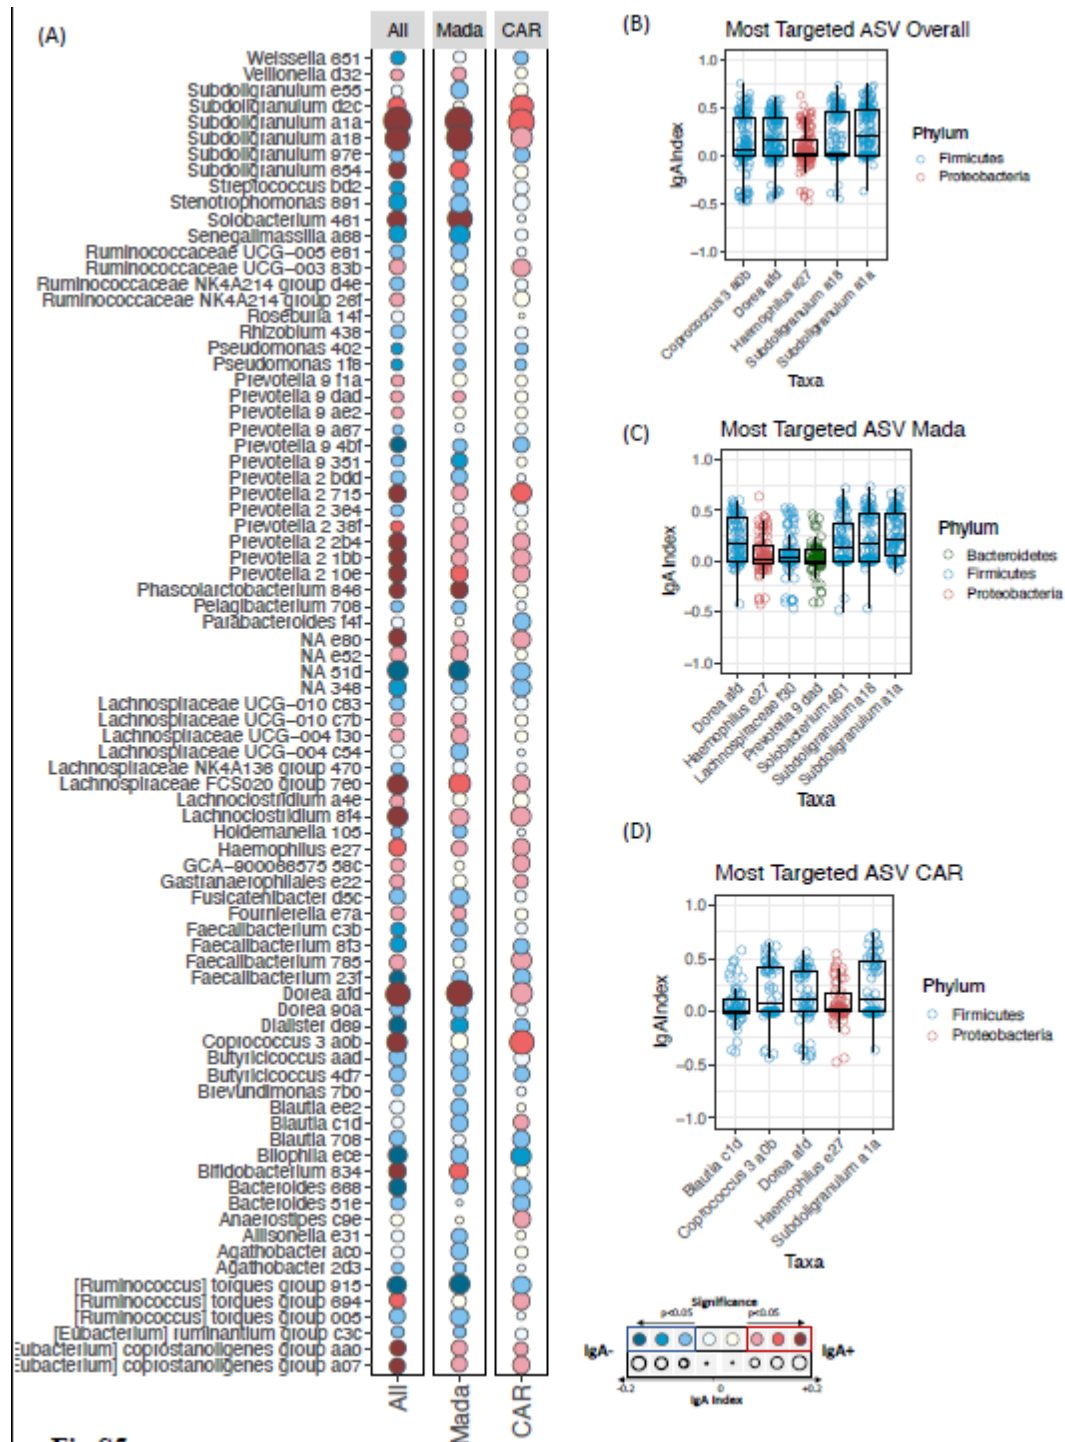

Supplement: MOESM5 [file 40168_2020_890_MOESM5_ESM.pdf]

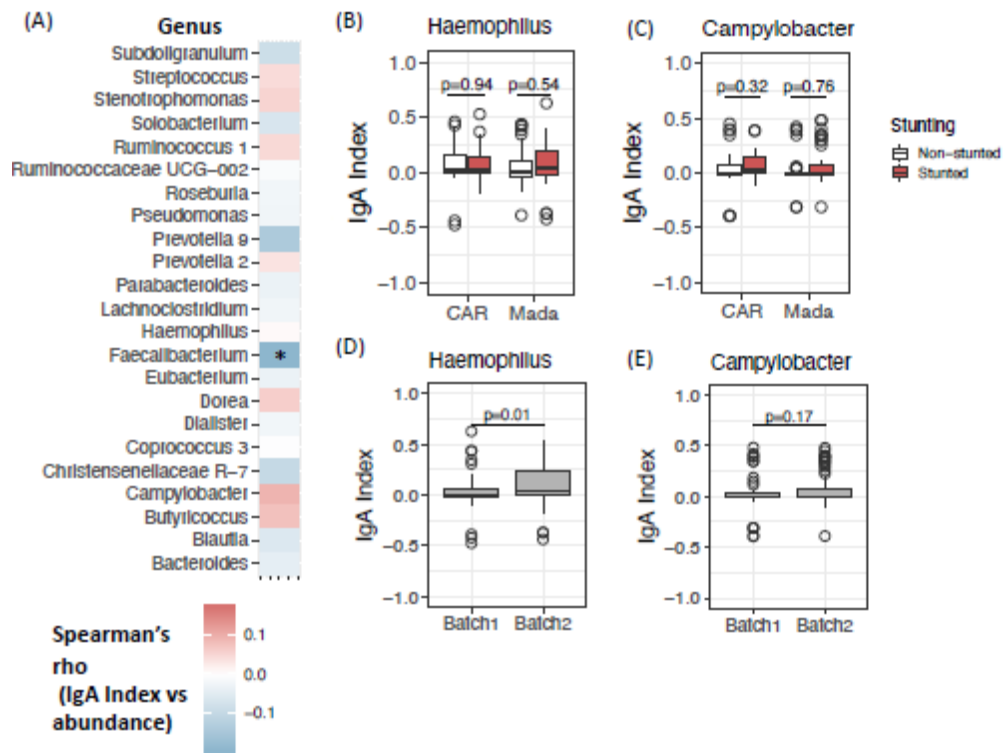

Fig S6.

Supplement: MOESM6 [file 40168_2020_890_MOESM6_ESM.pdf]

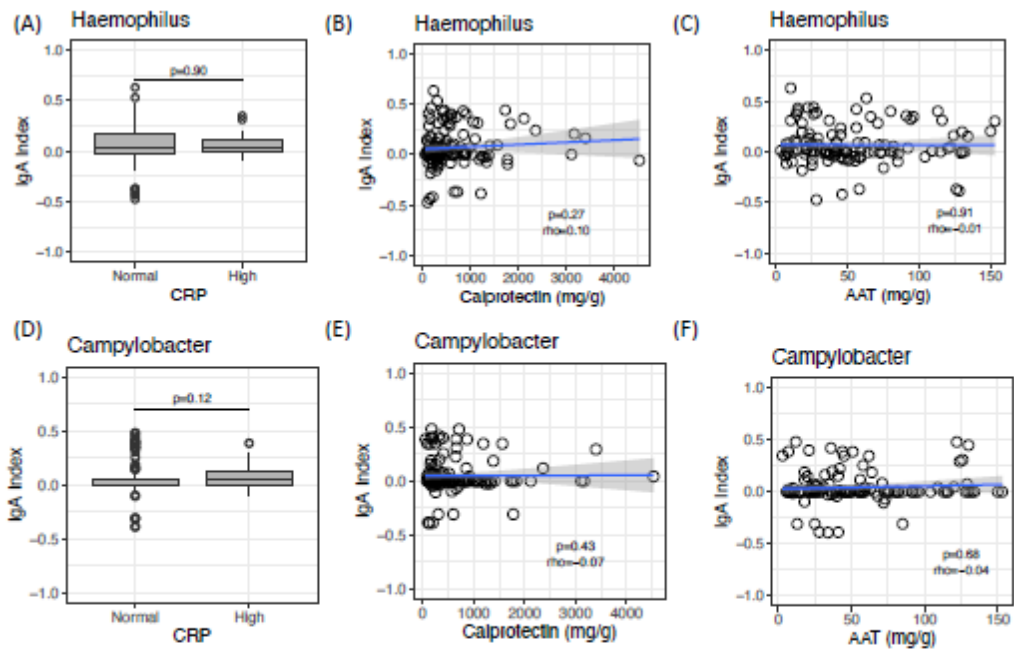

**Fig S7.**

Supplement: MOESM7 [file 40168_2020_890_MOESM7_ESM.pdf]

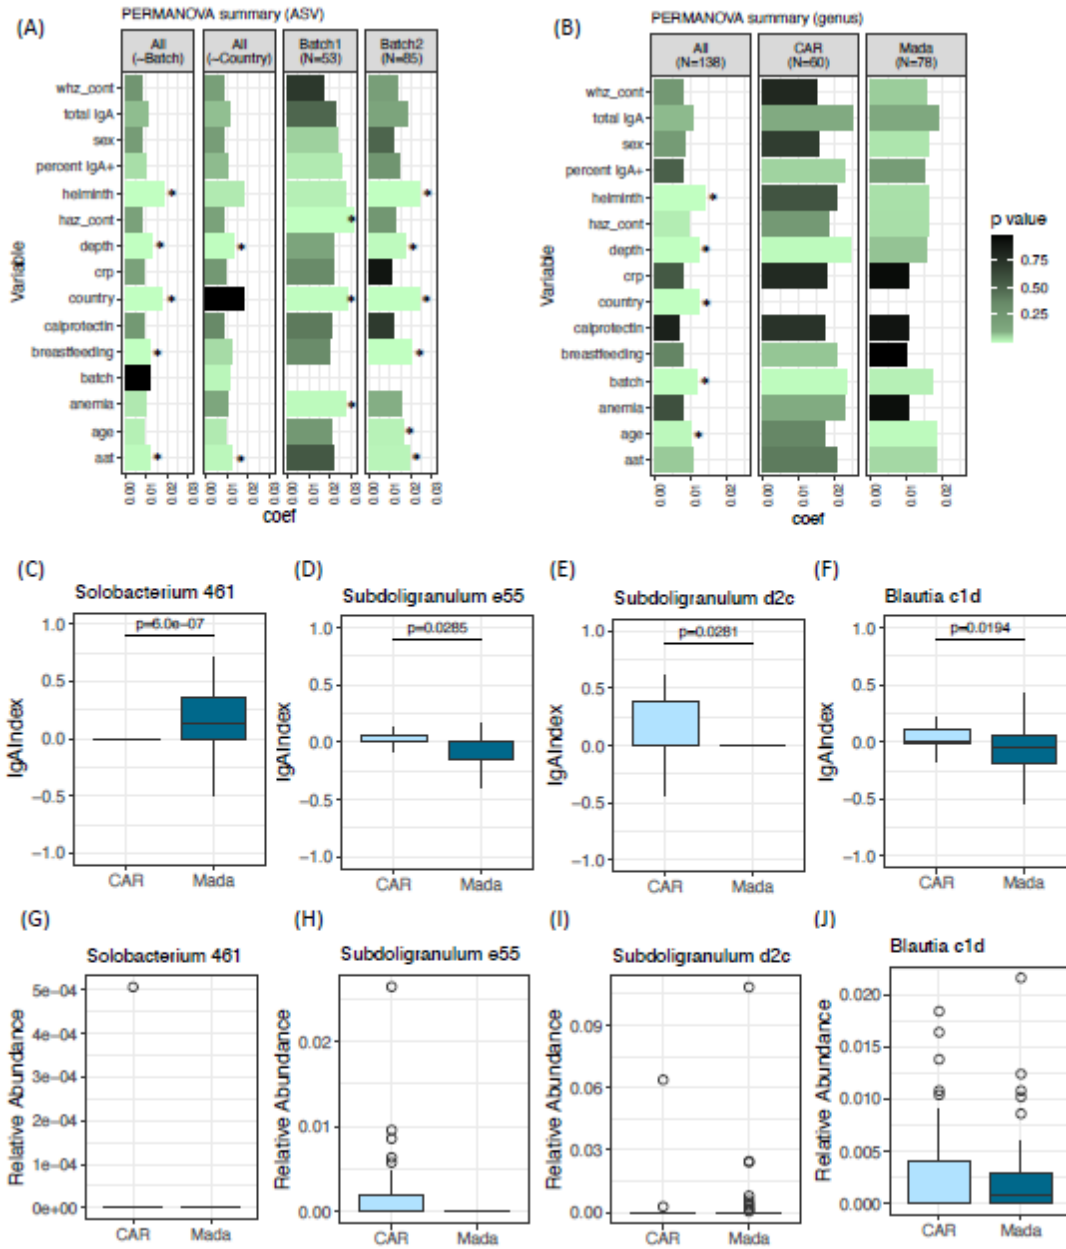

**Fig S8.**

Supplement: MOESM8 [file 40168_2020_890_MOESM8_ESM.pdf]

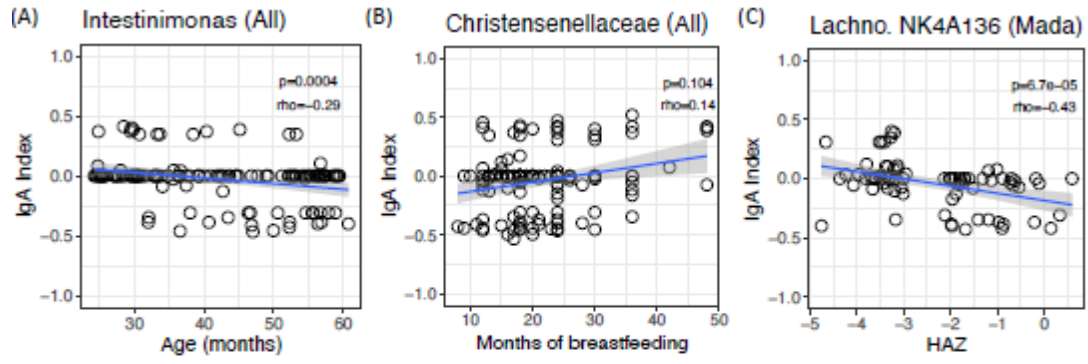

**Fig S9.**

Supplement: MOESM9 [file 40168_2020_890_MOESM9_ESM.pdf]
